# Supplementary material for: Characterization of a PEGylated protein therapeutic by ion exchange chromatography with on-line detection by native ESI MS and MS/MS
Source: Royal Society of Chemistry journal article supplement (doi:10.1039/c6an02041k), 2016-12-08

*Supplementary Material for*

**Characterization of a PEGylated protein therapeutic by ion exchange chromatography  
with on-line detection by native ESI MS and MS/MS**

Khaja Muneeruddin,<sup>1</sup> Cedric E. Bobst,<sup>1</sup> Ruth Frenkel,<sup>2</sup> Damian Houde,<sup>2</sup> Iva Turyan,<sup>2</sup> Zoran  
Susic,<sup>2</sup> and Igor A. Kaltashov<sup>1\*</sup>

*Department of Chemistry, University of Massachusetts Amherst, Amherst, MA<sup>1</sup> and*

*Analytical Development, Biogen, Cambridge, MA<sup>2</sup>*

---

\* Address correspondence to:  
Prof. Igor A. Kaltashov  
Department of Chemistry  
University of Massachusetts Amherst  
240 Thatcher Way  
Life Sciences Laboratories N369  
Amherst, MA 01003  
Email: kaltashov@chem.umass.edu  
Phone: (413) 545-1460  
Fax: (413) 545-4490

**Figure S1.** Purity assessment of PEG-IFN $\beta$  by SEC (top) and reversed-phase HPLC (bottom).

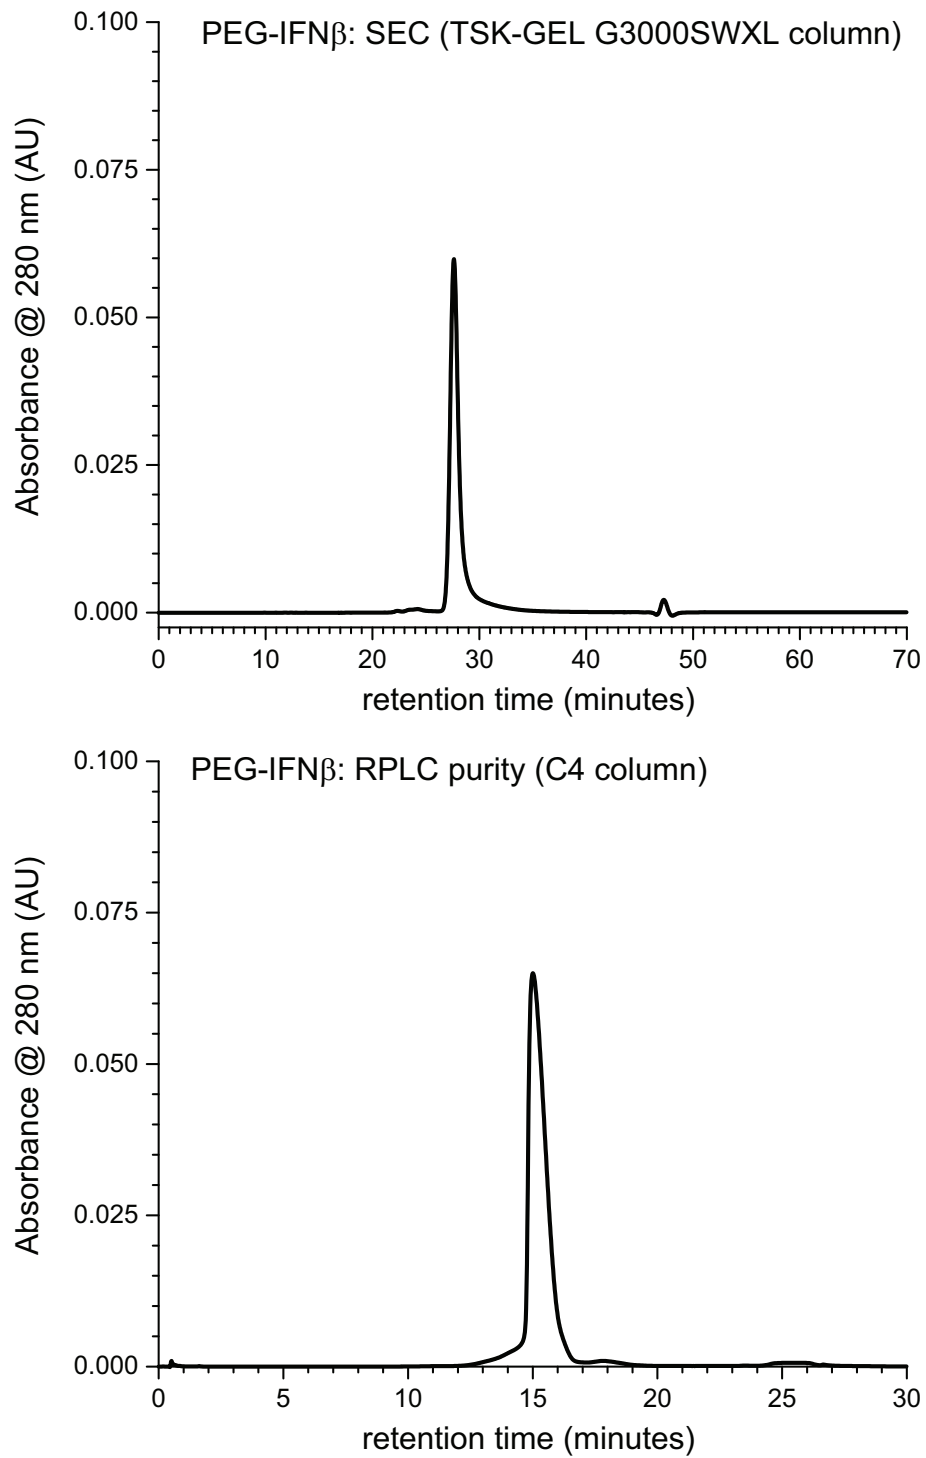

**Table S1.** Distribution of PEG-IFN $\beta$  glycoforms based on peptide mapping of unfractionated sample (relative peak areas of extracted ion chromatograms of glycopeptides in Lys-C digest) and on fluorescence measurements of released glycans labeled with 2-aminobenzoic acid. Glycoforms detected in the present work (on-line IXC/ESI/MS/MS) are highlighted in gray.

| <b>Carbohydrate composition</b> | <b>Peptide mapping (MS)</b> | <b>Released glycans (fluorescence)</b> |
|---------------------------------|-----------------------------|----------------------------------------|
| Non-glycosylated                | 0 %                         | n/a                                    |
| BiNA0                           | 2 %                         | 1.2 %                                  |
| BiNA1                           | 21 %                        | 9.3 %                                  |
| BiNA2                           | 68 %                        | 58.9 %                                 |
| TriLAcNA3                       | 3 %                         | 10.5 %                                 |
| TriNA3                          | 5%                          | 18.4 %                                 |
| BiNA3                           | 1 %                         | 1.8 %                                  |

**Figure S2.** A zoomed view of a mass spectrum of PEG-IFN $\beta$  ions produced by limited charge reduction of ESI-generated ions at  $m/z$  1000 and calculated isotopic distributions for several hypothetical PEG-IFN $\beta$  ions representing different protein glycoforms, lengths of PEG chain and composition of cationizing agents.

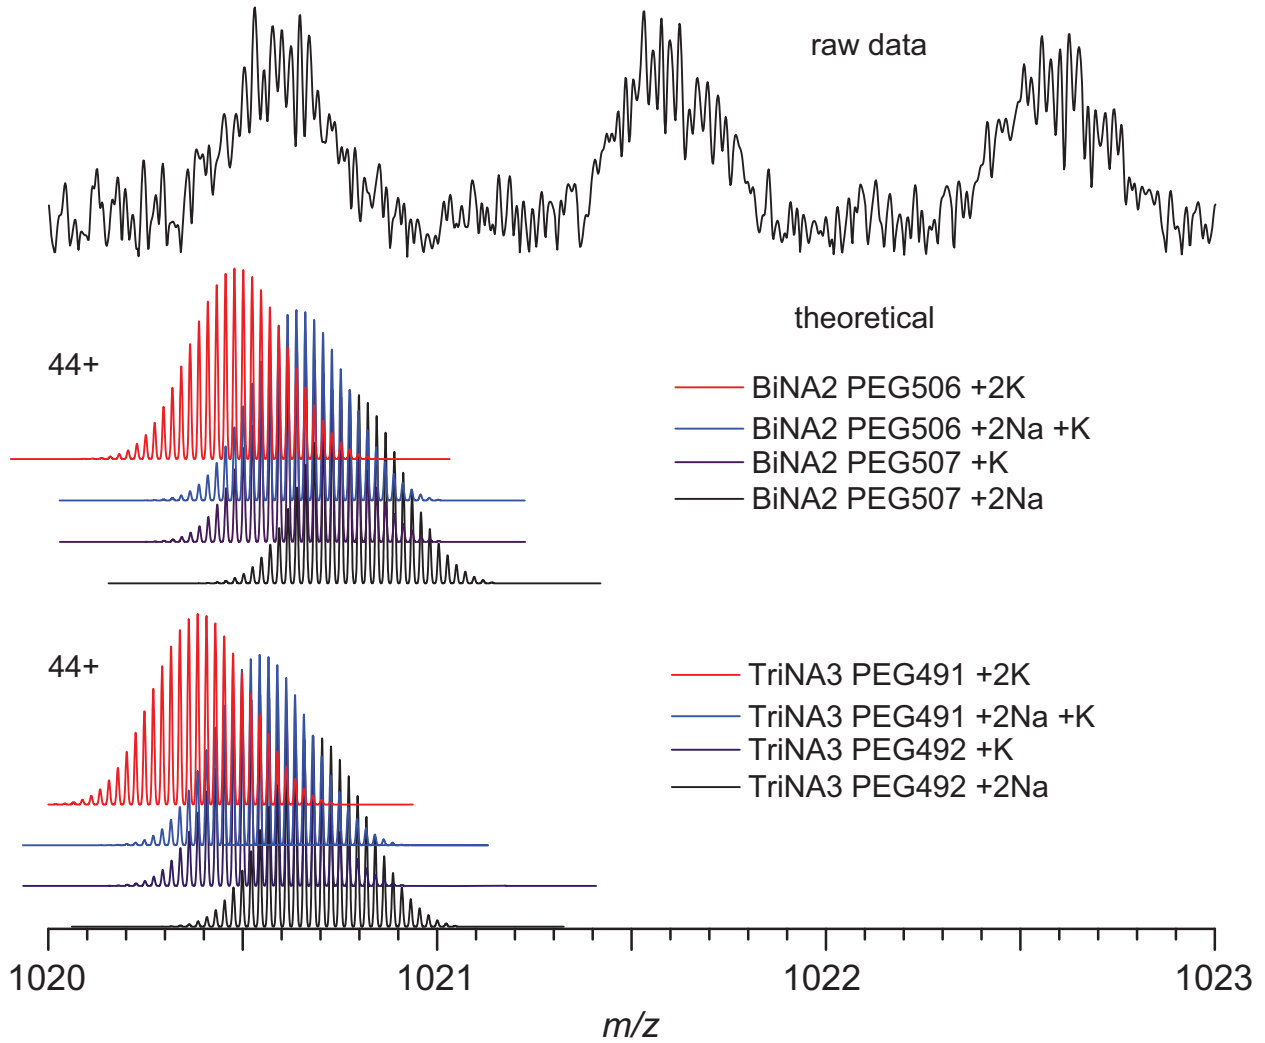

**Figure S3.** Mass spectra of PEG-IFN $\beta$  ions produced by limited charge reduction of ESI-generated ions at  $m/z$  1150 in on-line IXC/MS experiment (traces 1-3) and off-line without any chromatographic separation (gray-filled trace). The labels indicate the masses calculated for different ions.

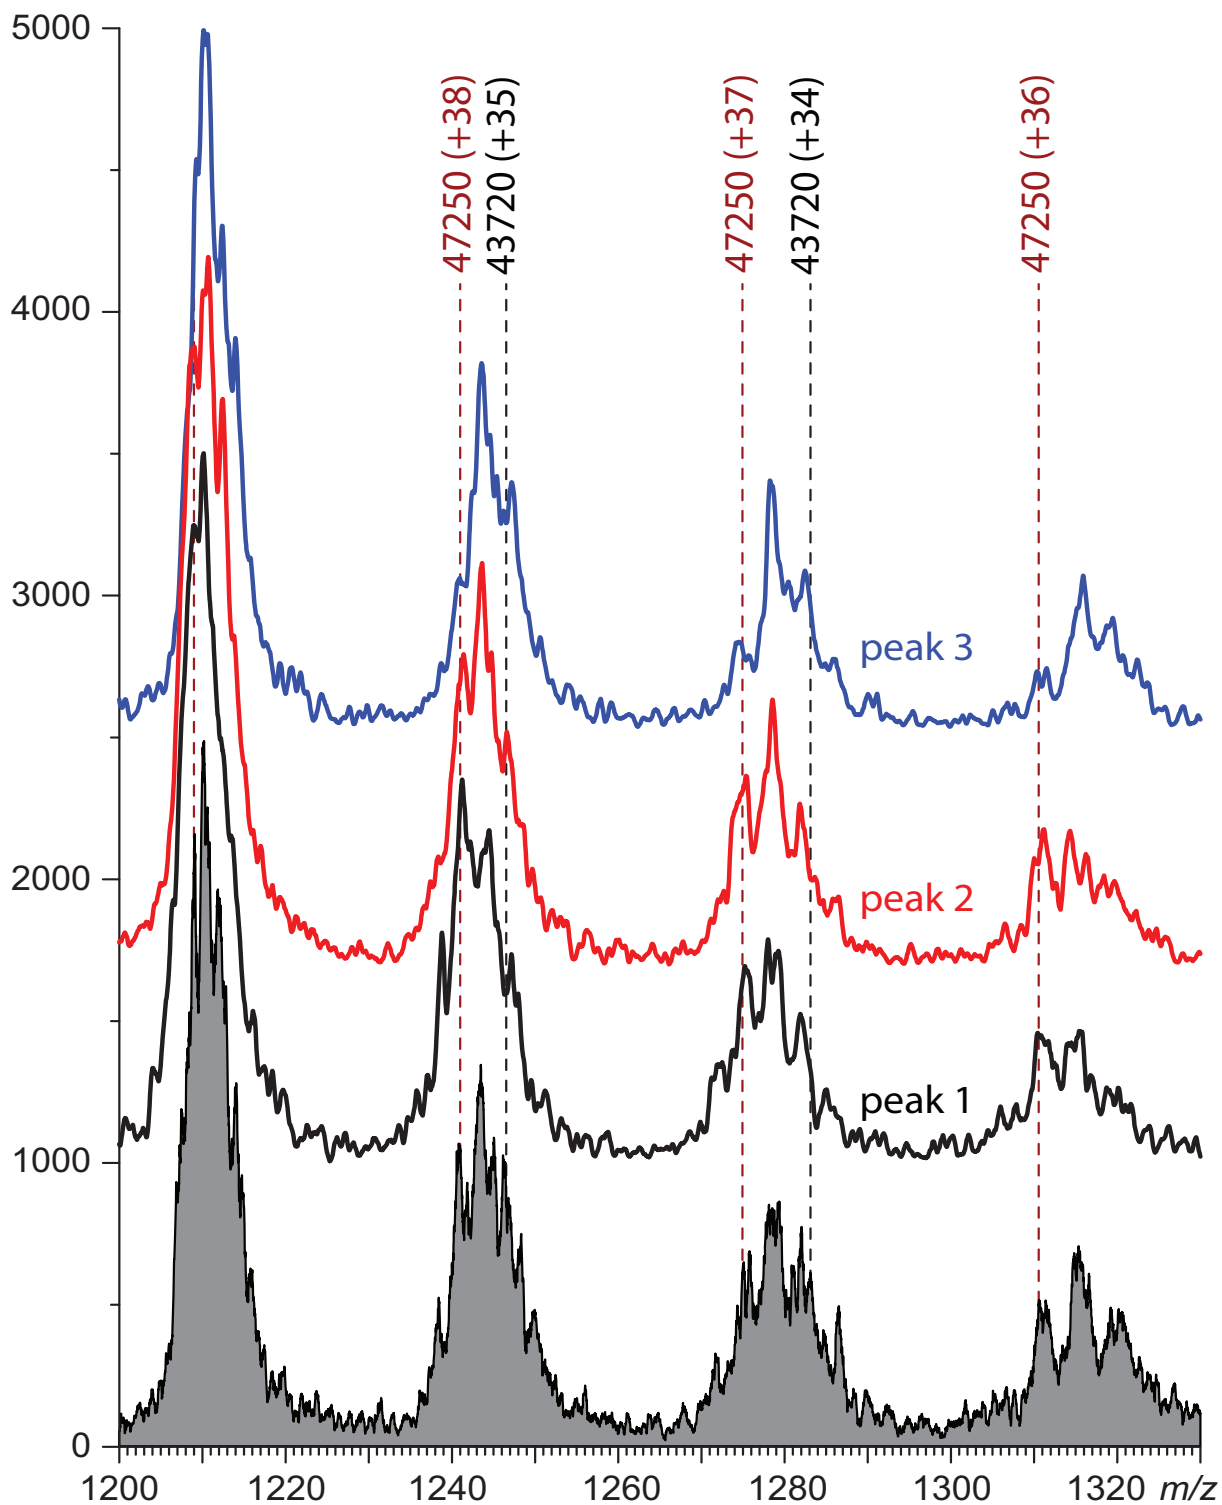

**Figure S4.** A zoomed view of a low- $m/z$  region of the on-line IXC/MS/MS spectrum averaged across the 31.9-33.5 min elution time window. The colored lines with arrows indicate spacing equal to 44 Da ( $\text{CH}_2\text{CH}_2\text{O}$  unit) adjusted for the charge state of small PEG fragments.

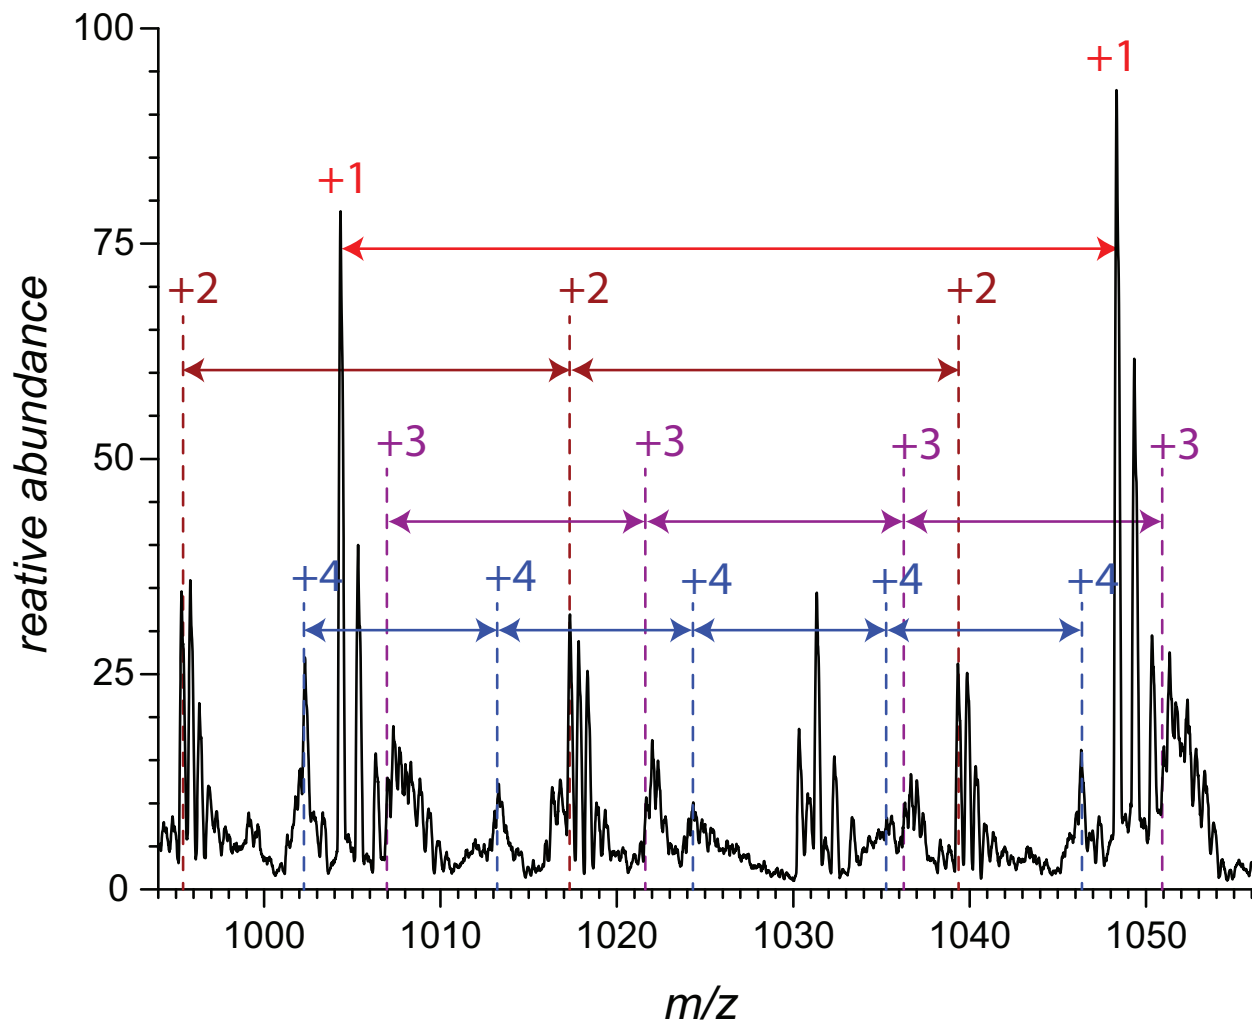

Supplement: c6an02041k1.pdf [file c6an02041k1.pdf]
